# Supplementary material for: Cognitive Dysfunction and Anxious-Impulsive Personality Traits Are Endophenotypes for Drug Dependence
Source: Atypon-hosted journal article supplement (doi:10.1176/appi.ajp.2012.11091421), 2012-09-01
Supplement: appi.ajp.2012.11091421_ds001.pdf [file appi.ajp.2012.11091421_ds001.pdf]

# Supplementary Materials

## Cognitive dysfunction and anxious-impulsive personality traits are endophenotypes for drug dependence

Karen D. Ersche, Abigail J. Turton, Samuel R. Chamberlain, Ulrich Müller, Edward T. Bullmore and Trevor W. Robbins

### Supplementary Methods

#### Study sample

Consistent with previous research (25, 26, 112), a considerable number of drug-dependent individuals also met criteria for major depression (44%) and/or anxiety disorder (42%). Two drug-dependent individuals (4%) satisfied the diagnostic criteria for obsessive-compulsive disorder and one drug user was HIV positive. There were correspondingly higher levels of concomitant medication prescribed to the drugs users and their siblings than to the healthy volunteers. Thus, four drug-dependent individuals (8%) were prescribed d-amphetamine and twenty-three drug-dependent individuals (46%) received methadone on prescription. Further concomitant medication in the drug user group was as followed: antidepressants (serotonin-reuptake inhibitors: 16%, tricyclic antidepressants: 10%), benzodiazepines (diazepam 8%), medication for hypertension (telmisartan 2%, propranolol 2%) or pain relief (gabapentin 4%), and agents for the treatment of asthma (beclomethasone 4%), HIV (abacavir/lamivudine 2%), or heartburn (omeprazole 2%).

Affective disorders were also present in the sibling group: three siblings had a current diagnosis of major depressive disorder (6%) and 12 had an anxiety disorder (24%). Two siblings were currently prescribed antibiotics (4%), another two were taken medication against heartburn (4%). There were no axis I disorders in the control group; one control volunteer received treatment for asthma (beclomethasone), another was receiving medication for heartburn (omeprazole), and one control volunteer was receiving antibiotics for the treatment of acne. We deliberately specified the eligibility criteria to be minimally exclusive because minor psychopathology in relatives or co-morbidity in drug-dependent individuals may be clinical markers of genetic risk and the identification of endophenotypes will not benefit from exclusion of high-risk individuals.

During the assessment session, all participants were asked whether anyone (or anyone else) in their family uses drugs or drinks heavily. If this was the case, participants were asked whether the use was problematic and why. The sibling pairs were assessed simultaneously but separately from each other and their reports about parental drug use concurred in all 50 pairs.

Some individuals in the sibling or volunteer groups were tobacco smokers (siblings: 54% current, 38% past tobacco smokers; volunteers: 12% current, 46% past tobacco smokers) and reported recreational use of cannabis (siblings: 10% current, 66% past; volunteers: 22% past). All urine screens provided by siblings and healthy volunteers were negative for drugs of abuse

**Figure S1:** Recruitment process: Stimulant-dependent individuals with a biological sibling were either referred by treatment services or self-referred to the study. The two most common reasons for the exclusion of the stimulant-dependent individuals were a non-biological sibling or a co-morbid psychotic disorder. Only stimulant-dependent individuals, who passed the screening process with regard to inclusion/exclusion criteria, were asked to contact one sibling to consider participation. The most common reason for exclusion for siblings was alcohol abuse. Healthy control volunteers were recruited through local advertisements also underwent a careful screening process. The two most common reasons for exclusion were current treatment with antidepressants or a family history of mental health problems. Healthy volunteers were matched as closely as possible to the sib-pairs with regard to age, gender and education level.

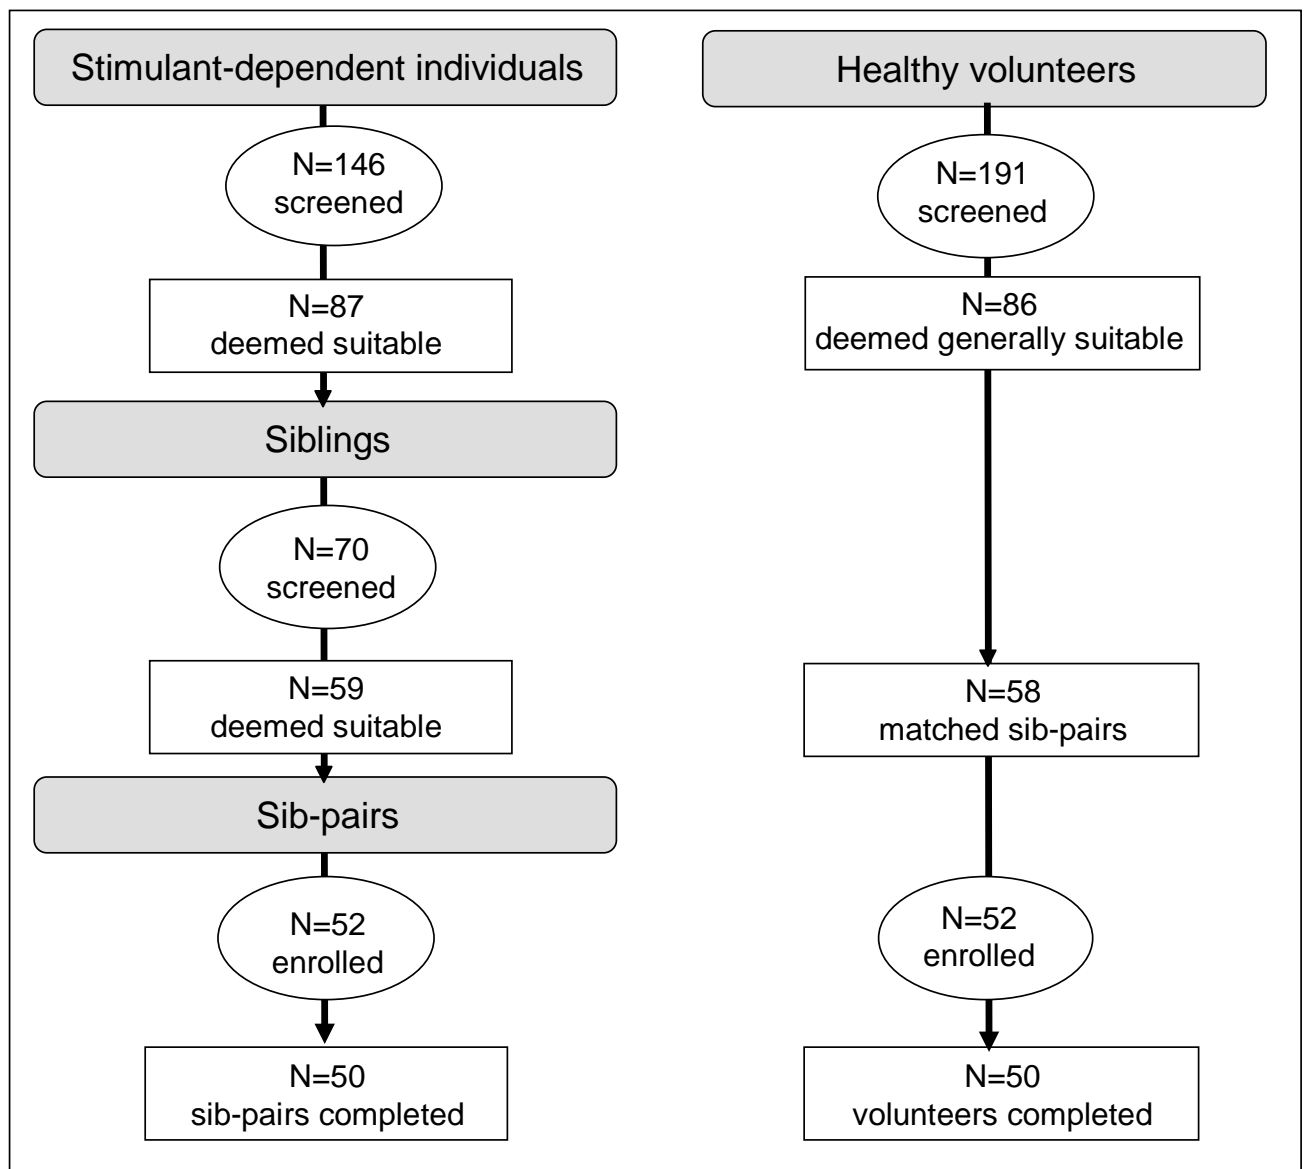

**Table S1:** Correlation Matrix

|                                    |                  | Executive function | Visual memory | Attention        | Response control | Emotional functioning | Psychosocial functioning | Impulsive-Compulsive | Self-evaluation traits |
|------------------------------------|------------------|--------------------|---------------|------------------|------------------|-----------------------|--------------------------|----------------------|------------------------|
| <b>Executive function</b>          | Pearson <i>r</i> | 1.000              | 0.108         | 0.143            | 0.319            | 0.416                 | 0.313                    | -0.341               | 0.236                  |
|                                    | <i>P</i>         |                    | 0.190         | 0.085            | <b>&lt;0.001</b> | <b>&lt;0.001</b>      | <b>&lt;0.001</b>         | <b>&lt;0.001</b>     | <b>0.004</b>           |
| <b>Visual memory</b>               | Pearson <i>r</i> | 0.108              | 1.000         | -0.007           | 0.055            | 0.114                 | -0.025                   | -0.077               | 0.120                  |
|                                    | <i>P</i>         | 0.190              |               | 0.937            | 0.505            | 0.165                 | 0.766                    | 0.348                | 0.145                  |
| <b>Attention</b>                   | Pearson <i>r</i> | 0.143              | -0.007        | 1.000            | 0.315            | 0.040                 | 0.052                    | 0.035                | 0.173                  |
|                                    | <i>P</i>         | 0.085              | 0.937         |                  | <b>&lt;0.001</b> | 0.630                 | 0.530                    | 0.677                | <b>0.037</b>           |
| <b>Response control</b>            | Pearson <i>r</i> | 0.319              | 0.055         | 0.315            | 1.000            | 0.240                 | 0.169                    | -0.128               | 0.193                  |
|                                    | <i>P</i>         | <b>&lt;0.001</b>   | 0.505         | <b>&lt;0.001</b> |                  | <b>0.003</b>          | <b>0.040</b>             | 0.121                | <b>0.018</b>           |
| <b>Emotional functioning</b>       | Pearson <i>r</i> | 0.416              | 0.114         | 0.040            | 0.240            | 1.000                 | 0.507                    | -0.479               | 0.585                  |
|                                    | <i>P</i>         | <b>&lt;0.001</b>   | 0.165         | 0.630            | <b>0.003</b>     |                       | <b>&lt;0.001</b>         | <b>&lt;0.001</b>     | <b>&lt;0.001</b>       |
| <b>Psychosocial functioning</b>    | Pearson <i>r</i> | 0.313              | -0.025        | 0.052            | 0.169            | 0.507                 | 1.000                    | -0.171               | 0.421                  |
|                                    | <i>P</i>         | <b>&lt;0.001</b>   | 0.766         | 0.530            | <b>0.040</b>     | <b>&lt;0.001</b>      |                          | <b>0.036</b>         | <b>&lt;0.001</b>       |
| <b>Impulsive-compulsive traits</b> | Pearson <i>r</i> | -0.341             | -0.077        | 0.035            | -0.128           | -0.479                | -0.171                   | 1.000                | -0.331                 |
|                                    | <i>P</i>         | <b>&lt;0.001</b>   | 0.348         | 0.677            | 0.121            | <b>&lt;0.001</b>      | <b>0.036</b>             |                      | <b>&lt;0.001</b>       |
| <b>Self-Evaluation traits</b>      | Pearson <i>r</i> | 0.236              | 0.120         | 0.173            | 0.193            | 0.585                 | 0.421                    | -0.331               | 1.000                  |
|                                    | <i>P</i>         | <b>0.004</b>       | 0.145         | <b>0.037</b>     | <b>0.018</b>     | <b>&lt;0.001</b>      | <b>&lt;0.001</b>         | <b>&lt;0.001</b>     |                        |

TABLE S2. Summary of the Neuropsychological Tests Used for the Cognitive Assessment

| Domain                            | Task <sup>a</sup>                   | Description                                                                                                                                                                                                                                         | Behavioral Variables                                                                                                                                                                                                                                                                                                                                                                                                          | Evidence for Impairment Associated With Stimulant Abuse |
|-----------------------------------|-------------------------------------|-----------------------------------------------------------------------------------------------------------------------------------------------------------------------------------------------------------------------------------------------------|-------------------------------------------------------------------------------------------------------------------------------------------------------------------------------------------------------------------------------------------------------------------------------------------------------------------------------------------------------------------------------------------------------------------------------|---------------------------------------------------------|
| CANTAB executive function battery | Spatial Working Memory              | A self-ordered search task involving a search through a spatial array of colored boxes for tokens, without returning to a box which had already contained a token (76); duration: 8 minutes                                                         | Strategy score (a high strategy score reflects an inefficient strategy); total errors; token-search time (ms)                                                                                                                                                                                                                                                                                                                 | Preclinical (77); clinical (16;18)                      |
|                                   | One-Touch Stockings of Cambridge    | A spatial planning test involving planning a sequence of moves to achieve a goal arrangement of colored balls without moving the balls (78); duration: 10–15 minutes                                                                                | Mean attempts to solve planning problems at varying levels of difficulty (easy solutions require 1–2 moves, medium solutions require 2–4 moves, hard solutions require 5–6 moves of mental planning)                                                                                                                                                                                                                          | Preclinical (79); clinical (15;16)                      |
| CANTAB visual memory battery      | Pattern Recognition Memory          | A two-choice test of abstract visual pattern recognition memory (80); duration: 5 minutes plus 25-minute delay                                                                                                                                      | Percentage correct; response time (ms)                                                                                                                                                                                                                                                                                                                                                                                        | Preclinical (79); clinical (15)                         |
|                                   | Paired Associates Learning          | A test of episodic memory which involves the learning of spatial locations of geometric visual patterns (81); duration: 10–15 minutes                                                                                                               | First trial memory score (sum of patterns correctly located after first presentation); total trials needed to learn the paired associates; total errors made to learn the paired associates                                                                                                                                                                                                                                   | Preclinical (82); clinical (15;18)                      |
| CANTAB attentional battery        | Reaction Time                       | A reaction time task which uses a procedure to separate response latency from movement time (83); duration: 5 minutes                                                                                                                               | Accuracy score; premature responses; response time (ms)                                                                                                                                                                                                                                                                                                                                                                       | Preclinical (84;85); clinical (86)                      |
|                                   | Rapid Visual Information Processing | A test of sustained attention in which infrequent 3-digit sequences have to be detected from among serially presented digits (87); duration: 8 minutes                                                                                              | A' (target sensitivity, a measure of discriminability between signal and noise; scores range from –1 to 1, with 0.5 equal to chance; higher A' indicate better target discrimination); B'' (response bias, a measure of an individual's response strategy (liberal versus conservative); scores range from –1 to 1); commission errors (incorrectly identified targets); omission errors (missed targets); response time (ms) | Preclinical (88); clinical (18;21)                      |
| Response Control                  | Stop-Signal Task                    | A test of response inhibition which uses staircase functions to generate an estimate of stop signal reaction time. Stop signals are presented such that the probability of successful inhibition is approximately 50% (89;90); duration: 20 minutes | Percent of successful stop trials; reaction time on successful go trials (ms); reaction time following stop trials (ms); SSRT (measure of response inhibition)                                                                                                                                                                                                                                                                | Preclinical (91;92); clinical (21;93-95)                |

<sup>a</sup> The tasks were administered to all participants approximately 2 hours after their arrival in the following order: Pattern Recognition Memory (immediate), Rapid Visual Information Processing, Spatial Working Memory; Reaction Time, Pattern Recognition Memory (delay), Paired Associates Learning, and One-Touch Stockings of Cambridge; the Stop-Signal Task was administered approximately 2 hours later.

TABLE 3. Summary of the Measures of Clinical, Emotional, Psychosocial, and Personality Assessment in a Study of Endophenotypes for Drug Dependence<sup>a</sup>

| Clinical Assessment                                     | Abbreviation | Description                                                                                                                                                                                                                                                                                                            |
|---------------------------------------------------------|--------------|------------------------------------------------------------------------------------------------------------------------------------------------------------------------------------------------------------------------------------------------------------------------------------------------------------------------|
| Structured Clinical Interview for DSM-IV-TR (42)        | SCID         | Diagnostic examination used to determine DSM-IV axis I and axis II disorders.                                                                                                                                                                                                                                          |
| Drug Abuse Screening Test (44)                          | DAST-20      | A quantitative index of whether a person's drug use is harmful or not. A cutoff score greater than 5 indicates probable drug abuse.                                                                                                                                                                                    |
| Alcohol Use Disorders Identification Test (45)          | AUDIT        | A quantitative index of whether a person's alcohol consumption is harmful. A cutoff score greater than 8 indicates probably alcohol abuse.                                                                                                                                                                             |
| National Adult Reading Test (96)                        | NART         | Estimation of premorbid intelligence levels of English-speaking individuals.                                                                                                                                                                                                                                           |
| Childhood Trauma Questionnaire (97)                     | CTQ          | Assessment of childhood maltreatment with regard to sexual, physical, and emotional abuse; emotional and physical neglect. The cutoff scores for the three abuse subscales are: for emotional abuse $\geq 13$ , for physical abuse $\geq 10$ , and for sexual abuse $\geq 8$ .                                         |
| <b>Emotional Functioning</b>                            |              |                                                                                                                                                                                                                                                                                                                        |
| Beck Depression Inventory-II (98)                       | BDI-II       | Index of depression severity; cut off scores for mild (14–19), moderate (20–28) severe depression (29–63)                                                                                                                                                                                                              |
| Snaith-Hamilton Pleasure Scale (99)                     | SHAPS        | A quantitative index of the presence and severity of anhedonia; cut-off score: $\geq 3$                                                                                                                                                                                                                                |
| Spielberger Anxiety Inventory (100)                     | STAI         | A quantitative index of the general propensity to be anxious (STAI-T) and a temporary state of feeling anxious (STAI-S). Cut-off score for clinically-relevant anxiety: $>40$                                                                                                                                          |
| Perceived Stress Scale (101)                            | PSS-14       | A quantitative index of the degree to which situations are appraised as stressful. Higher scores reflect higher levels of stress.                                                                                                                                                                                      |
| <b>Psychosocial Functioning</b>                         |              |                                                                                                                                                                                                                                                                                                                        |
| Community Integration Questionnaire (102)               | CIQ          | A quantitative index of an individual's integration into home and family life, social activity, and productive activity. Higher scores reflect better integration.                                                                                                                                                     |
| <b>Impulsive and Compulsive Traits</b>                  |              |                                                                                                                                                                                                                                                                                                                        |
| Barratt Impulsiveness Scale, Version 11 (103)           | BIS-11       | A quantitative index of trait-impulsivity. Scores are summed to yield one total score of the subscales for attention, motor behavior, nonplanning. Higher scores reflect greater levels of impulsivity.                                                                                                                |
| Sensation-Seeking Scale, Form V (104)                   | SSS-V        | A quantitative index of sensation-seeking. Scores are summed to yield one total score of the subscales for thrill and adventure seeking, experience seeking, disinhibition, boredom susceptibility. Higher scores reflect greater levels of sensation-seeking traits.                                                  |
| Behavioral-Approach/Behavioral Inhibition Scale (105)   | BIS/BAS      | The BIS items assess behavioral tendencies in the anticipation of punishment and the BAS items assess behavior in the anticipation of rewarding outcomes.                                                                                                                                                              |
| Padua Inventory for Obsessive-Compulsive Symptoms (106) | PI-WSUR      | A quantitative index of common obsessional and compulsive behaviors. Scores are summed to yield one total score of the subscales for thoughts of harming self/others, impulses to harm self/others, contamination / washing, checking compulsions, and dressing/grooming. Higher scores reflect higher symptom levels. |
| <b>Self-Evaluation traits</b>                           |              |                                                                                                                                                                                                                                                                                                                        |
| General Self-Efficacy Scale (107)                       | GES          | A quantitative index of a person's optimistic self-beliefs to cope with daily hassles and life events. Higher scores reflect higher levels of self-efficacy.                                                                                                                                                           |
| Social Comparison Rating Scale (108)                    | SCRS         | A measure that uses the semantic-differential approach to assess how individuals evaluate themselves in relation to others. Higher scores reflect a better assimilation / more similarities with others.                                                                                                               |

Internal-External Scale (109) I-E A quantitative index of the degree to which a person feels that rewards in life are contingent on his/her own behavior or are controlled by external forces<sup>a</sup>. Higher scores reflect more external control beliefs.

<sup>a</sup> The three items of the Internal-External Scale referring to situations at school have been found inappropriate for adults(110;111) and were therefore removed from the scale.

## References

1. Nutt DJ, Robbins TW, Stimson GV, Ince M, Jackson ARW: Drugs and the Future: Brain Science, Addiction and Society. Oxford, UK, Elsevier, 2006
2. Nutt D, King LA, Saulsbury W, Blakemore C: Development of a rational scale to assess the harm of drugs of potential misuse. *Lancet* 2007; 369:1047–1053 PubMed
3. Merikangas KR, Stolar M, Stevens DE, Goulet J, Preisig MA, Fenton B, Zhang HP, O'Malley SS, Rounsaville BJ: Familial transmission of substance use disorders. *Arch Gen Psychiatry* 1998; 55:973–979 PubMed
4. Kendler KS, Jacobson KC, Prescott CA, Neale MC: Specificity of genetic and environmental risk factors for use and abuse/dependence of cannabis, cocaine, hallucinogens, sedatives, stimulants, and opiates in male twins. *Am J Psychiatry* 2003; 160:687–695 PubMed
5. Tyrfingsson T, Thorgeirsson TE, Geller F, Runarsdottir V, Hansdottir I, Bjornsdottir G, Wiste AK, Jonsdottir GA, Stefansson H, Gulcher JR, Oskarsson H, Gudbjartsson D, Stefansson K: Addictions and their familiarity in Iceland. *Ann N Y Acad Sci* 2010; 1187: 208–217
6. Zucker RA: The developmental behavior genetics of drug involvement: overview and comments. *Behav Genet* 2006; 36:616–625 PubMed
7. Vanyukov MM, Kirisci L, Moss L, Tarter RE, Reynolds MD, Maher BS, Kirillova GP, Ridenour T, Clark DB: Measurement of the risk for substance use disorders: phenotypic and genetic analysis of an index of common liability. *Behav Genet* 2009; 39:233–244 PubMed
8. Tsuang MT, Lyons MJ, Meyer JM, Doyle T, Eisen SA, Goldberg J, True W, Lin N, Toomey R, Eaves L: Co-occurrence of abuse of different drugs in men: the role of drug-specific and shared vulnerabilities. *Arch Gen Psychiatry* 1998; 55:967–972 PubMed
9. Bierut LJ: Genetic vulnerability and susceptibility to substance dependence. *Neuron* 2011; 69:618–627 PubMed



10. Gottesman II, Gould TD: The endophenotype concept in psychiatry: etymology and strategic intentions. *Am J Psychiatry* 2003; 160:636–645 PubMed
11. Dalley JW, Cardinal RN, Robbins TW: Prefrontal executive and cognitive functions in rodents: neural and neurochemical substrates. *Neurosci Biobehav Rev* 2004; 28:771–784 PubMed
12. Goldstein RZ, Volkow ND: Drug addiction and its underlying neurobiological basis: neuroimaging evidence for the involvement of the frontal cortex. *Am J Psychiatry* 2002; 159:1642–1652 PubMed
13. Fillmore MT, Rush CR: Impaired inhibitory control of behavior in chronic cocaine users. *Drug Alcohol Depend* 2002; 66:265–273 PubMed
14. Monterosso JR, Aron AR, Cordova X, Xu J, London ED: Deficits in response inhibition associated with chronic methamphetamine abuse. *Drug Alcohol Depend* 2005; 79:273–277 PubMed
15. Ersche KD, Clark L, London M, Robbins TW, Sahakian BJ: Profile of executive and memory function associated with amphetamine and opiate dependence. *Neuropsychopharmacology* 2006; 31:1036–1047 PubMed
16. Ornstein TJ, Iddon JL, Baldacchino AM, Sahakian BJ, London M, Everitt BJ, Robbins TW: Profiles of cognitive dysfunction in chronic amphetamine and heroin abusers. *Neuropsychopharmacology* 2000; 23:113–126 PubMed
17. Tomasi D, Goldstein RZ, Telang F, Maloney T, Alia-Klein N, Caparelli EC, Volkow ND: Widespread disruption in brain activation patterns to a working memory task during cocaine abstinence. *Brain Res* 2007; 1171:83–92
18. Ersche KD, Roiser JP, Lucas M, Domenici E, Robbins TW, Bullmore ET: Peripheral biomarkers of cognitive response to dopamine receptor agonist treatment. *Psychopharmacology (Berl)* 2011; 214:779–789 PubMed
19. Fernández-Serrano MJ, Pérez-García M, Schmidt Río-Valle J, Verdejo-García A: Neuropsychological consequences of alcohol and drug abuse on different components of executive functions. *J Psychopharmacol* 2010; 24:1317–1332 PubMed

20. Gooding DC, Burroughs S, Boutros NN: Attentional deficits in cocaine-dependent patients: converging behavioral and electrophysiological evidence. *Psychiatry Res* 2008; 160:145–154 PubMed
21. Ersche KD, Barnes A, Jones PS, Morein-Zamir S, Robbins TW, Bullmore ET: Abnormal structure of frontostriatal brain systems is associated with aspects of impulsivity and compulsivity in cocaine dependence. *Brain* 2011; 134:2013–2024 PubMed
22. London ED, Berman SM, Voytek B, Simon SL, Mandelkern MA, Monterosso J, Thompson PM, Brody AL, Geaga JA, Hong MS, Hayashi KM, Rawson RA, Ling W: Cerebral metabolic dysfunction and impaired vigilance in recently abstinent methamphetamine abusers. *Biol Psychiatry* 2005; 58:770–778 PubMed
23. Beveridge TJR, Smith HR, Daunais JB, Nader MA, Porrino LJ: Chronic cocaine self-administration is associated with altered functional activity in the temporal lobes of non human primates. *Eur J Neurosci* 2006; 23:3109–3118 PubMed
24. Beveridge TJR, Gill KE, Hanlon CA, Porrino LJ: Parallel studies of cocaine-related neural and cognitive impairment in humans and monkeys. *Philos Trans R Soc Lond B Biol Sci* 2008; 363:3257–3266
25. Regier DA, Farmer ME, Rae DS, Locke BZ, Keith SJ, Judd LL, Goodwin FK: Comorbidity of mental disorders with alcohol and other drug abuse: results from the Epidemiologic Catchment Area (ECA) study. *JAMA* 1990; 264:2511–2518 PubMed
26. Merikangas KR, Mehta RL, Molnar BE, Walters EE, Swendsen JD, Aguilar-Gaziola S, Bijl R, Borges G, Caraveo-Anduaga JJ, Dewit DJ, Kolody B, Vega WA, Wittchen HU, Kessler RC: Comorbidity of substance use disorders with mood and anxiety disorders: results of the International Consortium in Psychiatric Epidemiology. *Addict Behav* 1998; 23:893–907
27. Merikangas KR, Dierker LC, Szatmari P: Psychopathology among offspring of parents with substance abuse and/or anxiety disorders: a high-risk study. *J Child Psychol Psychiatry* 1998; 39:711–720 PubMed
28. Volkow ND: The reality of comorbidity: depression and drug abuse. *Biol Psychiatry* 2004; 56:714–717 PubMed

29. Kosten TR, Markou A, Koob GF: Depression and stimulant dependence: neurobiology and pharmacotherapy. *J Nerv Ment Dis* 1998; 186:737–745 PubMed
30. Markou A, Kosten TR, Koob GF: Neurobiological similarities in depression and drug dependence: a self-medication hypothesis. *Neuropsychopharmacology* 1998; 18:135–174 PubMed
31. Hawkins JD, Catalano RF, Miller JY: Risk and protective factors for alcohol and other drug problems in adolescence and early adulthood: implications for substance abuse prevention. *Psychol Bull* 1992; 112:64–105 PubMed
32. Fisher M, Crome I, Macleod J, Bloor R, Hickman M: Predictive factors for illicit drug use among young people: a literature review. *Probation Journal* 2007; 54:278–279
33. de Wit H: Impulsivity as a determinant and consequence of drug use: a review of underlying processes. *Addict Biol* 2009; 14:22–31 PubMed
34. Meda SA, Stevens MC, Potenza MN, Pittman B, Gueorguieva R, Andrews MM, Thomas AD, Muska C, Hylton JL, Pearlson GD: Investigating the behavioral and self-report constructs of impulsivity domains using principal component analysis. *Behav Pharmacol* 2009; 20:390–399 PubMed
35. Stephenson MT, Helme DW: Authoritative parenting and sensation seeking as predictors of adolescent cigarette and marijuana use. *J Drug Educ* 2006; 36:247–270 PubMed
36. Lawrance L, Rubinson L: Self-efficacy as a predictor of smoking behavior in young adolescents. *Addict Behav* 1986; 11:367–382 PubMed
37. Barkin SL, Smith KS, DuRant RH: Social skills and attitudes associated with substance use behaviors among young adolescents. *J Adolesc Health* 2002; 30:448–454 PubMed
38. Newcomb MD, Harlow LL: Life events and substance use among adolescents: mediating effects of perceived loss of control and meaninglessness in life. *J Pers Soc Psychol* 1986; 51:564–577 PubMed
39. Ersche KD, Turton AJ, Croudace T, Stoehl J: Who do you think is in control in addiction? a pilot study on drug-related locus of control beliefs. *Addict Disord Their Treatment* (Epub ahead of print, Jan 15, 2012)

40. Dielman TE, Campanelli PC, Shope JT, Butchart AT: Susceptibility to peer pressure, self-esteem, and health locus of control as correlates of adolescent substance abuse. *Health Educ Q* 1987; 14:207–221  
PubMed
41. Goldman D, Oroszi G, Ducci F: The genetics of addictions: uncovering the genes. *Nat Rev Genet* 2005; 6:521–532 PubMed
42. First MB, Spitzer RL, Gibbon M, Williams JBW: Structured Clinical Interview for DSM-IV-TR Axis I Disorders, Research Version, Non-Patient Edition (SCID-I/NP). New York, New York State Psychiatric Institute, Biometrics Research, 2002
43. Franken IHA, Hendriksa VM, van den Brink W: Initial validation of two opiate craving questionnaires the Obsessive Compulsive Drug Use Scale and the Desires for Drug Questionnaire. *Addict Behav* 2002; 27:675–685 PubMed
44. Gavin DR, Ross HE, Skinner HA: Diagnostic validity of the Drug Abuse Screening Test in the assessment of DSM-III drug disorders. *Br J Addict* 1989; 84:301–307 PubMed
45. Saunders JB, Aasland OG, Babor TF, de la Fuente JR, Grant M: Development of the Alcohol Use Disorders Identification Test (AUDIT): WHO Collaborative Project on Early Detection of Persons with Harmful Alcohol Consumption—II. *Addiction* 1993; 88:791–804 PubMed
46. Menzies L, Achard S, Chamberlain SR, Fineberg N, Chen CH, del Campo N, Sahakian BJ, Robbins TW, Bullmore E: Neurocognitive endophenotypes of obsessive-compulsive disorder. *Brain* 2007; 130:3223–3236 PubMed
47. Hartlage S, Alloy LB, Vázquez C, Dykman B: Automatic and effortful processing in depression. *Psychol Bull* 1993; 113:247–278 PubMed
48. Howell DC: *Statistical Methods for Psychology*. London, Duxbury Press, 1997
49. Bradley RG, Binder EB, Epstein MP, Tang Y, Nair HP, Liu W, Gillespie CF, Berg T, Evces M, Newport DJ, Stowe ZN, Heim CM, Nemeroff CB, Schwartz A, Cubells JF, Ressler KJ: Influence of child abuse

- on adult depression: moderation by the corticotropin-releasing hormone receptor gene. *Arch Gen Psychiatry* 2008; 65:190–200 PubMed
50. Acheson A, Richard DM, Mathias CW, Dougherty DM: Adults with a family history of alcohol related problems are more impulsive on measures of response initiation and response inhibition. *Drug Alcohol Depend* 2011; 117:198–203 PubMed
51. Tarter RE, Kirisci L, Mezzich A, Cornelius JR, Pajer K, Vanyukov M, Gardner W, Blackson T, Clark D: Neurobehavioral disinhibition in childhood predicts early age at onset of substance use disorder. *Am J Psychiatry* 2003; 160:1078–1085 PubMed
52. Dawes MA, Tarter RE, Kirisci L: Behavioral self-regulation: correlates and 2-year follow-ups for boys at risk for substance abuse. *Drug Alcohol Depend* 1997; 45:165–176 PubMed
53. Nigg JT, Wong MM, Martel MM, Jester JM, Puttler LI, Glass JM, Adams KM, Fitzgerald HE, Zucker RA: Poor response inhibition as a predictor of problem drinking and illicit drug use in adolescents at risk for alcoholism and other substance use disorders. *J Am Acad Child Adolesc Psychiatry* 2006; 45:468–475 PubMed
54. Chambers RA, Taylor JR, Potenza MN: Developmental neurocircuitry of motivation in adolescence: a critical period of addiction vulnerability. *Am J Psychiatry* 2003; 160:1041–1052 PubMed
55. Kalivas PW, Volkow ND: The neural basis of addiction: a pathology of motivation and choice. *Am J Psychiatry* 2005; 162:1403–1413 PubMed
56. Ersche KD, Jones PS, Williams GB, Turton AJ, Robbins TW, Bullmore ET: Abnormal brain structure implicated in stimulant drug addiction. *Science* 2012; 335:601–604 PubMed
57. Ersche KD, Turton AJ, Pradhan S, Bullmore ET, Robbins TW: Drug addiction endophenotypes: impulsive versus sensation-seeking personality traits. *Biol Psychiatry* 2010; 68:770–773 PubMed
58. Newman JP, Wallace JF: Diverse pathways to deficient self-regulation: implications for disinhibitory psychopathology in children. *Clin Psychol Rev* 1993; 13:699–720

59. Whiteside SP, Lynam DR: The Five Factor Model and impulsivity: using a structural model of personality to understand impulsivity. *Pers Individ Dif* 2001; 30:669–689
60. Casey BJ, Jones RM, Hare TA: The adolescent brain. *Ann NY Acad Sci* 2008; 1124:111–126 PubMed
61. Steinberg L: Cognitive and affective development in adolescence. *Trends Cogn Sci* 2005; 9:69–74 PubMed
62. Lewis MD, Todd RM: The self-regulating brain: cortical-subcortical feedback and the development of intelligent action. *Cogn Dev* 2007; 22:406–430
63. Ernst M, Romeo RD, Andersen SL: Neurobiology of the development of motivated behaviors in adolescence: a window into a neural systems model. *Pharmacol Biochem Behav* 2009; 93:199–211 PubMed
64. Mann M, Hosman CMH, Schaalma HP, de Vries NK: Self-esteem in a broad-spectrum approach for mental health promotion. *Health Educ Res* 2004; 19:357–372 PubMed
65. DiClemente CC: Self-efficacy and the addictive behaviours. *J Soc Clin Psychol* 1986; 4:302–315
66. Narvaez JCM, Magalhaes PVS, Trindade EK, Vieira DC, Kauer-Sant’Anna M, Gama CS, von Diemen L, Kapczinski NS, Kapczinski F: Childhood trauma, impulsivity, and executive functioning in crack cocaine users. *Compr Psychiatry* 2012; 53:238–244 PubMed
67. Brodsky BS, Oquendo M, Ellis SP, Haas GL, Malone KM, Mann JJ: The relationship of childhood abuse to impulsivity and suicidal behavior in adults with major depression. *Am J Psychiatry* 2001; 158:1871–1877 PubMed
68. Roy A: Childhood trauma and impulsivity: possible relevance to suicidal behavior. *Arch Suicide Res* 2005; 9:147–151 PubMed
69. Pechtel P, Pizzagalli DA: Effects of early life stress on cognitive and affective function: an integrated review of human literature. *Psychopharmacology (Berl)* 2011; 214:55–70 PubMed

70. Verdejo-García A, Pérez-García M: Profile of executive deficits in cocaine and heroin polysubstance users: common and differential effects on separate executive components. *Psychopharmacology (Berl)* 2007; 190:517–530 PubMed
71. Pace-Schott EF, Morgan PT, Malison RT, Hart CL, Edgar C, Walker M, Stickgold R: Cocaine users differ from normals on cognitive tasks which show poorer performance during drug abstinence. *Am J Drug Alcohol Abuse* 2008; 34:109–121 PubMed
72. Woicik PA, Moeller SJ, Alia-Klein N, Maloney T, Lukasik TM, Yeliosof O, Wang GJ, Volkow ND, Goldstein RZ: The neuropsychology of cocaine addiction: recent cocaine use masks impairment. *Neuropsychopharmacology* 2008; 34:1112–1122
73. Kreek MJ, Koob GF: Drug dependence: stress and dysregulation of brain reward pathways. *Drug Alcohol Depend* 1998; 51:23–47 PubMed
74. Sinha R: How does stress increase risk of drug abuse and relapse? *Psychopharmacology (Berl)* 2001; 158:343–359 PubMed
75. Lee ACH, Owen AM, Rogers RD, Sahakian BJ, Robbins TW: Utility of CANTAB in Functional Neuroimaging, in *Functional Neuroimaging in Child Psychology*. Edited by Ernst M, Rumsey J. Cambridge, UK, Cambridge University Press, 2000, pp 366–377
76. Owen AM, Downes JJ, Sahakian BJ, Polkey CE, Robbins TW: Planning and spatial working memory following frontal lobe lesions in man. *Neuropsychologia* 1990; 28:1021–1034 PubMed
77. Chudasama Y, Robbins TW: Dopaminergic modulation of visual attention and working memory in the rodent prefrontal cortex. *Neuropsychopharmacology* 2004; 29:1628–1636 PubMed
78. Owen AM, Sahakian BJ, Semple J, Polkey CE, Robbins TW: Visuo-spatial short-term recognition memory and learning after temporal lobe excisions, frontal lobe excisions or amygdalo-hippocampectomy in man. *Neuropsychologia* 1995; 33:1–24 PubMed
79. Chudasama Y: Animal models of prefrontal-executive function. *Behav Neurosci* 2011; 125:327–343 PubMed

80. Mehta MA, Sahakian BJ, McKenna PJ, Robbins TW: Systemic sulphiride in young adult volunteers simulates the profile of cognitive deficits in Parkinson's disease. *Psychopharmacology (Berl)* 1999; 146:162–174 PubMed
81. Sahakian BJ, Morris RG, Evenden JL, Heald A, Levy R, Philpot M, Robbins TW: A comparative study of visuospatial memory and learning in Alzheimer-type dementia and Parkinson's disease. *Brain* 1988; 111:695–718 PubMed
82. Talpos JC, Winters BD, Dias R, Saksida LM, Bussey TJ: A novel touchscreen-automated paired-associate learning (PAL) task sensitive to pharmacological manipulation of the hippocampus: a translational rodent model of cognitive impairments in neurodegenerative disease. *Psychopharmacology (Berl)* 2009; 205:157–168 PubMed
83. Sahakian BJ, Owen AM, Morant NJ, Eagger SA, Boddington S, Crayton L, Crockford HA, Crooks M, Hill K, Levy R: Further analysis of the cognitive effects of tetrahydroaminoacridine (THA) in Alzheimer's disease: assessment of attentional and mnemonic function using CANTAB. *Psychopharmacology (Berl)* 1993; 110:395–401 PubMed
84. Robbins TW: The 5-choice serial reaction time task: behavioural pharmacology and functional neurochemistry. *Psychopharmacology (Berl)* 2002; 163:362–380 PubMed
85. Dalley JW, Fryer TD, Brichard L, Robinson ESJ, Theobald DEH, Lääne K, Peña Y, Murphy ER, Shah Y, Probst K, Abakumova I, Aigbirhio FI, Richards HK, Hong Y, Baron JC, Everitt BJ, Robbins TW: Nucleus accumbens D2/3 receptors predict trait impulsivity and cocaine reinforcement. *Science* 2007; 315:1267–1270 PubMed
86. Comer SD, Haney M, Foltin RW, Fischman MW: Amphetamine self-administration by humans: modulation by contingencies associated with task performance. *Psychopharmacology (Berl)* 1996; 127:39–46 PubMed



87. Park SB, Coull JT, McShane RH, Young AH, Sahakian BJ, Robbins TW, Cowen PJ: Tryptophan depletion in normal volunteers produces selective impairments in learning and memory. *Neuropharmacology* 1994; 33:575–588 PubMed
88. Gendle MH, Strawderman MS, Mactutus CF, Booze RM, Levitsky DA, Strupp BJ: Impaired sustained attention and altered reactivity to errors in an animal model of prenatal cocaine exposure. *Brain Res Dev Brain Res* 2003; 147:85–96 PubMed
89. Aron AR, Fletcher PC, Bullmore ET, Sahakian BJ, Robbins TW: Stop-signal inhibition disrupted by damage to right inferior frontal gyrus in humans. *Nat Neurosci* 2003; 6:115–116 PubMed
90. Logan GD, Schachar RJ, Tannock R: Impulsivity and inhibitory control. *Psychol Sci* 1997; 8:60–64
91. Eagle DM, Bari A, Robbins TW: The neuropsychopharmacology of action inhibition: cross-species translation of the stop-signal and go/no-go tasks. *Psychopharmacology (Berl)* 2008; 199:439–456 PubMed
92. Eagle DM, Baunez C, Hutcheson DM, Lehmann O, Shah AP, Robbins TW: Stop-signal reaction-time task performance: role of prefrontal cortex and subthalamic nucleus. *Cereb Cortex* 2008; 18:178–188 PubMed
93. Monterosso JR, Aron AR, Cordova X, Xu J, London ED: Deficits in response inhibition associated with chronic methamphetamine abuse. *Drug Alcohol Depend* 2005; 79:273–277 PubMed
94. Li CSR, Morgan PT, Matuskey D, Abdelghany O, Luo X, Chang JLK, Rounsaville BJ, Ding YS, Malison RT: Biological markers of the effects of intravenous methylphenidate on improving inhibitory control in cocaine-dependent patients. *Proc Natl Acad Sci USA* 2010; 107:14455–14459 PubMed
95. Li CS, Milivojevic V, Kemp K, Hong K, Sinha R: Performance monitoring and stop signal inhibition in abstinent patients with cocaine dependence. *Drug Alcohol Depend* 2006; 85:205–212 PubMed
96. Nelson HE: National Adult Reading Test Manual. Windsor, UK, NFER-Nelson, 1982

97. Bernstein DP, Stein JA, Newcomb MD, Walker E, Pogge D, Ahluvalia T, Stokes J, Handelsman L, Medrano M, Desmond D, Zule W: Development and validation of a brief screening version of the Childhood Trauma Questionnaire. *Child Abuse Negl* 2003; 27:169–190 PubMed
98. Beck AT, Steer RA, Brown GK: Manual for Beck Depression Inventory-II. San Antonio, Tex, Psychological Corporation, 1996
99. Snaith RP, Hamilton M, Morley S, Humayan A, Hargreaves D, Trigwell P: A scale for the assessment of hedonic tone: the Snaith-Hamilton Pleasure Scale. *Br J Psychiatry* 1995; 167:99–103 PubMed
100. Spielberger C, Gorsuch R, Lushene R: STAI manual for the State-Trait Anxiety Inventory. Palo Alto, Calif, Consulting Psychologists Press, 1983
101. Cohen S, Kamarck T, Mermelstein R: A global measure of perceived stress. *J Health Soc Behav* 1983; 24:385–396 PubMed
102. Willer B, Ottenbacher KJ, Coad ML: The community integration questionnaire: a comparative examination. *Am J Phys Med Rehabil* 1994; 73:103–111 PubMed
103. Patton JH, Stanford MS, Barratt ES: Factor structure of the Barratt Impulsiveness Scale. *J Clin Psychol* 1995; 51:768–774 PubMed
104. Zuckerman M, Eysenck S, Eysenck HJ: Sensation seeking in England and America: cross-cultural, age, and sex comparisons. *J Consult Clin Psychol* 1978; 46:139–149 PubMed
105. Carver CS, White TL: Behavioral-inhibition, behavioral activation, and affective responses to impending reward and punishment: the BIS/BAS Scales. *J Pers Soc Psychol* 1994; 67:319–333
106. Burns GL, Keortge SG, Formea GM, Sternberger LG: Revision of the Padua Inventory of Obsessive Compulsive Disorder Symptoms: distinctions between worry, obsessions, and compulsions. *Behav Res Ther* 1996; 34:163–173 PubMed
107. Schwarzer R, Jerusalem M: Generalised Self-Efficacy Scale, in *Measures in Health Psychology: A Users' Portfolio: Causal and Control Beliefs*. Edited by Weiman J, Wright S, Johnston M. Windsor, UK, NFER-Nelson, 1995, pp 35–37

108. Allan S, Gilbert P: A social comparison scale: psychometric properties and relationship to psychopathology. *Pers Individ Dif* 1995; 19:293–299
109. Rotter JB: Generalized expectancies for internal versus external control of reinforcement. *Psychol Monogr* 1966; 80:1–28 PubMed
110. Chamberlain SR, Fineberg NA, Menzies LA, Blackwell AD, Bullmore ET, Robbins TW, Sahakian BJ: Impaired cognitive flexibility and motor inhibition in unaffected first-degree relatives of patients with obsessive-compulsive disorder. *Am J Psychiatry* 2007; 164:335–338 PubMed
111. Menzies L, Achard S, Chamberlain SR, Fineberg NA, Chen C-H, del Campo N, Sahakian BJ, Robbins TW, Bullmore ET: Neurocognitive endophenotypes of obsessive-compulsive disorder. *Brain* 2007; 130:3223–3236
112. Goodwin RD, Stayner DA, Chinman MJ, Wu P, Tebes JK, Davidson L: The relationship between anxiety and substance use disorders among individuals with severe affective disorders. *Comprehensive Psychiatry* 2002; 43(4):245-252
